# Supplementary material for: Reversible sorption of carbon dioxide in Ca–Mg–Fe systems for thermochemical energy storage applications
Source: Royal Society of Chemistry journal article supplement (doi:10.1039/d4ta01365d), 2024-01-01
Supplement: d4ta01365d1.pdf [file d4ta01365d1.pdf]

## Supplementary Information

### **Reversible sorption of carbon dioxide in Ca-Mg-Fe systems for thermochemical energy storage applications**

Lucie Desage,<sup>a</sup> Terry D. Humphries,<sup>a\*</sup> Mark Paskevicius,<sup>a</sup> Craig E. Buckley.<sup>a</sup>

<sup>a</sup> Physics and Astronomy, School of Electrical Engineering, Computing and Mathematical Sciences, Institute for Energy Transition, Curtin University, GPO Box U1987, Perth, WA 6845, Australia.

\*E-mail: [terry\\_humphries81@hotmail.com](mailto:terry_humphries81@hotmail.com)

**Table S1.** Description of the natural ankerite samples.

| <b>Sample ID</b>  | <b>Geographic origin</b>                                                       | <b>Mineral description</b>         |
|-------------------|--------------------------------------------------------------------------------|------------------------------------|
| <b>Ankerite-1</b> | Tansifite Caïdat, Agdz Cercle, Zagora Province, Drâa-Tafilalet Region, Morocco | Devilline and selenite on ankerite |
| <b>Ankerite-2</b> | Binn Valley, Valais, Switzerland (Turb Alp)                                    | Goethite pseudo after ankerite     |
| <b>Ankerite-3</b> | Spain                                                                          | Ankerite                           |

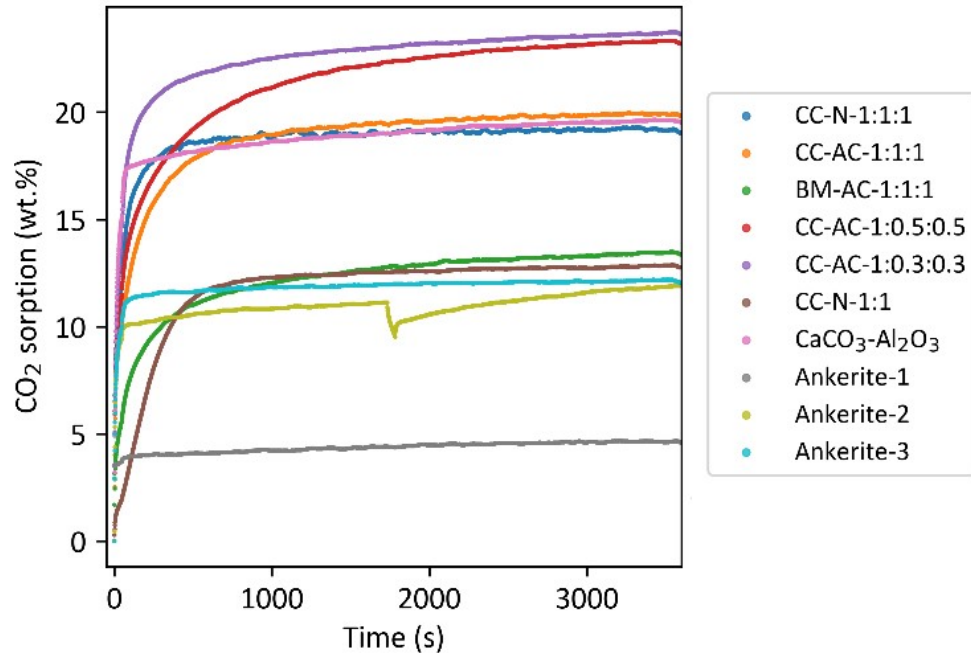

**Figure S1.** Evolution of the CO<sub>2</sub> wt.% absorption over time during the first cycle.

**Table S2.** Quantitative analysis of the sample composition of CaCO<sub>3</sub>-Al<sub>2</sub>O<sub>3</sub> (20 wt.%) before and after 100 cycles at 750 °C (1 h vacuum desorption / 1 h absorption at 5 bar CO<sub>2</sub>).

| <b>Composition (%)</b>            | <b>CaCO<sub>3</sub></b> | <b>Al<sub>2</sub>O<sub>3</sub></b> | <b>Hydrated Al<sub>2</sub>O<sub>3</sub></b> | <b>CaMg(CO<sub>3</sub>)<sub>2</sub></b> | <b>CaO</b> | <b>Ca<sub>5</sub>Al<sub>6</sub>O<sub>14</sub></b> | <b>Ca<sub>9</sub>Al<sub>6</sub>O<sub>18</sub></b> | <b>CaAl<sub>12</sub>O<sub>19</sub></b> |
|-----------------------------------|-------------------------|------------------------------------|---------------------------------------------|-----------------------------------------|------------|---------------------------------------------------|---------------------------------------------------|----------------------------------------|
| <b>Initial</b>                    | 79.4(4)                 | 16.0(4)                            | 0.2(7)                                      | 4.5(2)                                  | -          | -                                                 | -                                                 | -                                      |
| <b>After 100 cycles at 750 °C</b> | 50.1(1)                 | 18.8(4)                            | -                                           | -                                       | 15.0(3)    | 4.6(7)                                            | 10.3(2)                                           | 1.2(3)                                 |

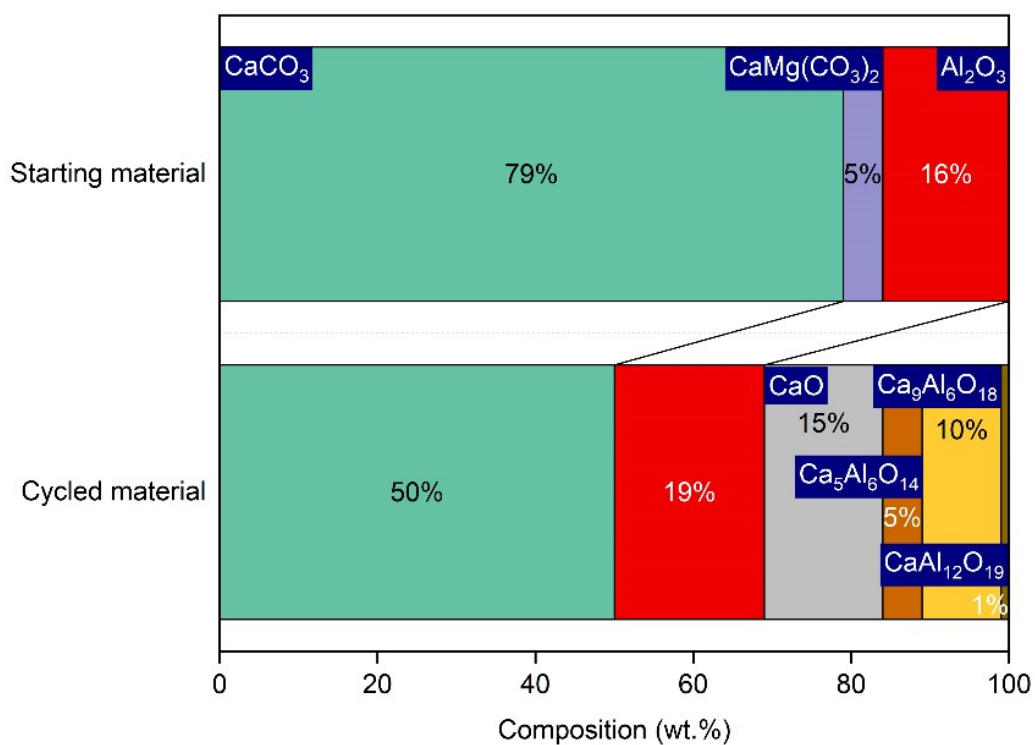

**Figure S2.** Composition of the CaCO<sub>3</sub>-Al<sub>2</sub>O<sub>3</sub> (20 wt.%) before and after 100 cycles at 750 °C with 1 h vacuum desorption and 1 h absorption at 5 bar CO<sub>2</sub>. The samples are in the carbonated state and the XRD patterns are presented in Figure S3 and Figure S4.

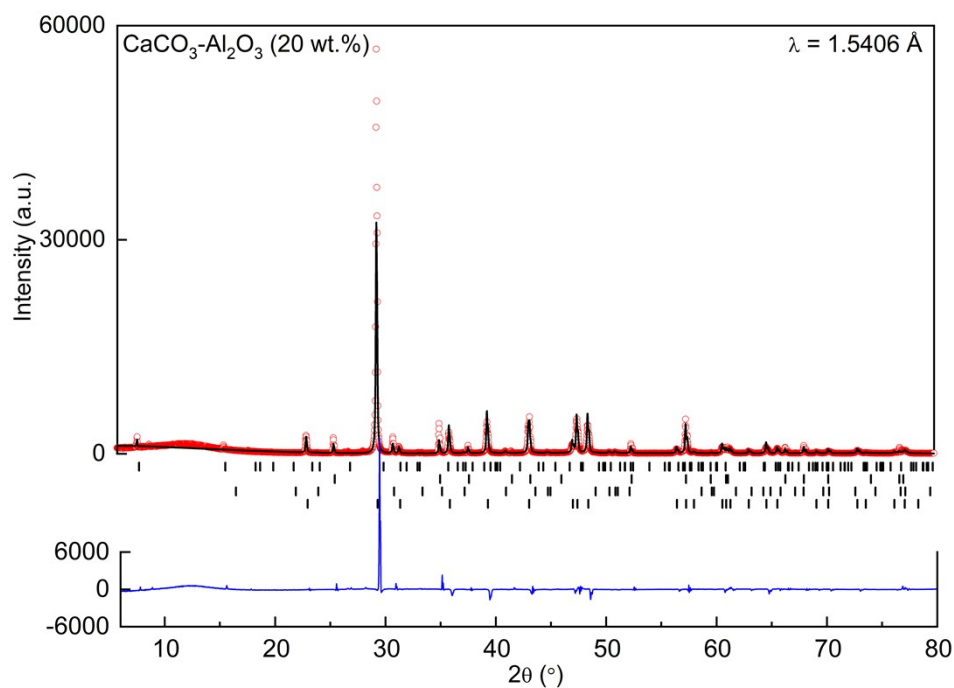

**Figure S3.** XRD pattern and fitting curve of the Rietveld refinement of  $\text{CaCO}_3\text{-Al}_2\text{O}_3$  (20 wt.%). Experimental data as red circles, calculated diffraction pattern as black line and the difference plot in blue. Tick marks show positions for:  $\text{CaCO}_3$ , Dolomite,  $\text{Al}_2\text{O}_3$  and hydrated  $\text{Al}_2\text{O}_3$ , bottom to top, respectively.

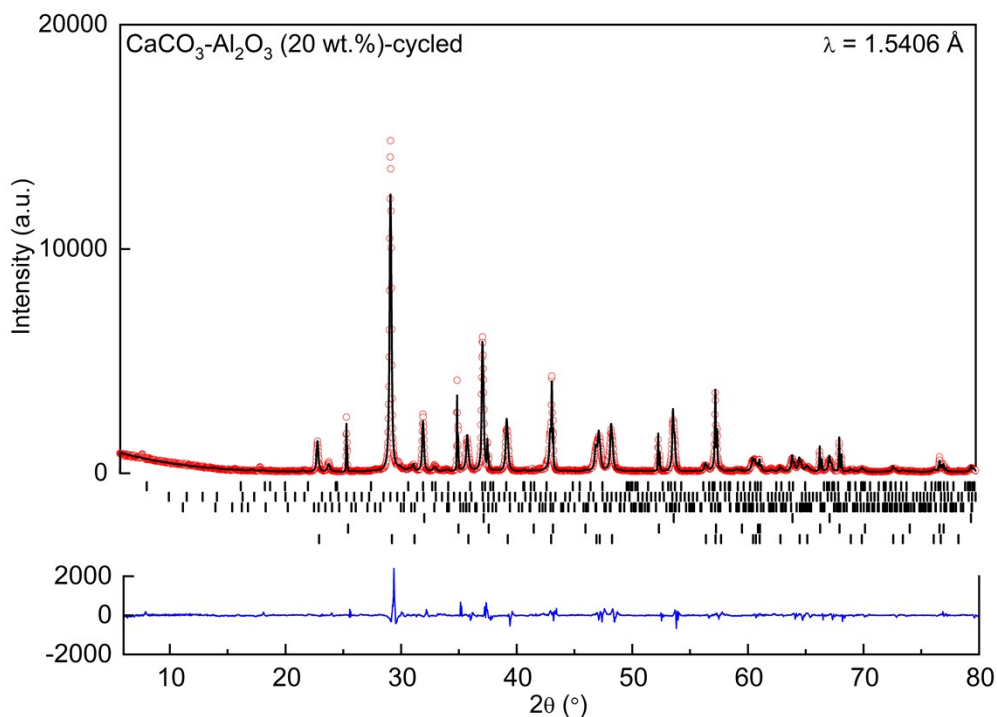

**Figure S4.** XRD pattern and fitting curve of the Rietveld refinement of cycled  $\text{CaCO}_3\text{-Al}_2\text{O}_3$  (20 wt.%). Experimental data as red circles, calculated diffraction pattern as black line and the difference plot in blue. Tick marks show positions for:  $\text{CaCO}_3$ ,  $\text{Al}_2\text{O}_3$ ,  $\text{CaO}$ ,  $\text{Ca}_5\text{Al}_6\text{O}_{14}$ ,  $\text{Ca}_9\text{Al}_6\text{O}_{18}$  and  $\text{CaAl}_{12}\text{O}_{19}$ , bottom to top, respectively.

**Table S3.** Quantitative analysis of the sample composition of the natural ankerite samples.

| Composition (%) | $\text{Ca}(\text{Mg,Fe})(\text{CO}_3)_2$ | $\text{CaSO}_4$ | $\text{CaCO}_3$ | $\text{SiO}_2$ | $\text{FeO}(\text{OH})$ |
|-----------------|------------------------------------------|-----------------|-----------------|----------------|-------------------------|
| Ankerite-1      | 85.8(2)                                  | 14.2(2)         | -               | -              | -                       |
| Ankerite-2      | -                                        | -               | 55.6(1)         | -              | 44.4(1)                 |
| Ankerite-3      | 67.0(2)                                  | -               | -               | 33.0(2)        | -                       |

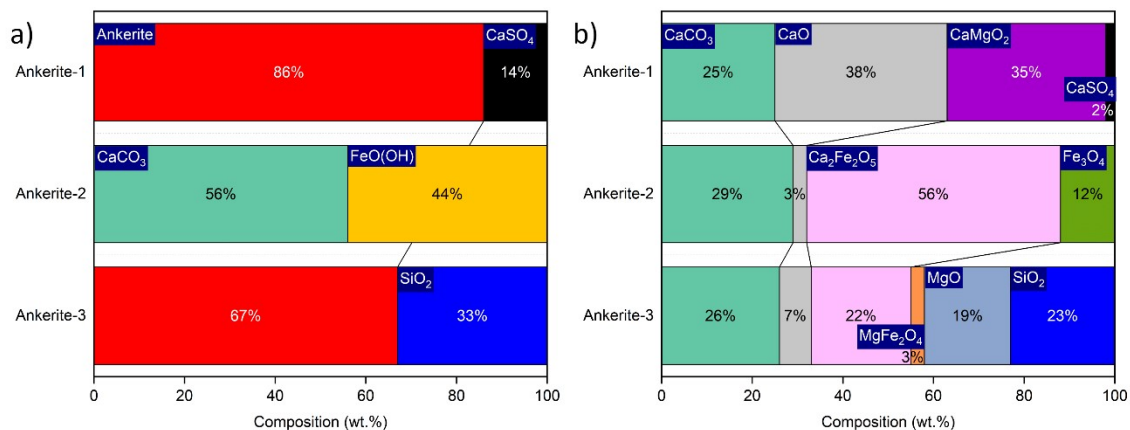

**Figure S5.** Quantitative composition determined by Rietveld refinement of: (a) the natural Ankerite samples and (b) after 100 cycles at 750 °C with 1 hour vacuum desorption and 1 hour absorption at 5 bar CO<sub>2</sub>. All samples are in the carbonated state and the SR-XRD patterns are presented in Figure S6 to Figure S11.



**Table S4.** Quantitative analysis of the sample composition of the natural ankerite samples after 100 cycles at 750 °C (1 h vacuum desorption / 1 h absorption at 5 bar CO<sub>2</sub>).

| <b>Composition (%)</b> | <b>CaCO<sub>3</sub></b> | <b>CaO</b> | <b>CaMgO</b> | <b>CaSO<sub>4</sub></b> | <b>Ca<sub>2</sub>Fe<sub>2</sub>O<sub>5</sub></b> | <b>Fe<sub>3</sub>O<sub>4</sub></b> | <b>MgO</b> | <b>MgFe<sub>2</sub>O<sub>4</sub></b> | <b>SiO<sub>2</sub></b> |
|------------------------|-------------------------|------------|--------------|-------------------------|--------------------------------------------------|------------------------------------|------------|--------------------------------------|------------------------|
| <b>Ankerite-1</b>      | 25.2(1)                 | 38.0(1)    | 34.6(1)      | 2.2(1)                  | -                                                | -                                  | -          | -                                    | -                      |
| <b>Ankerite-2</b>      | 28.5(1)                 | 3.2(5)     | -            | -                       | 56.1(1)                                          | 12.3(8)                            | -          | -                                    | -                      |
| <b>Ankerite-3</b>      | 25.7(9)                 | 7.0(4)     | -            | -                       | -                                                | -                                  | 19.2(9)    | 3.4(4)                               | 23.5(8)                |

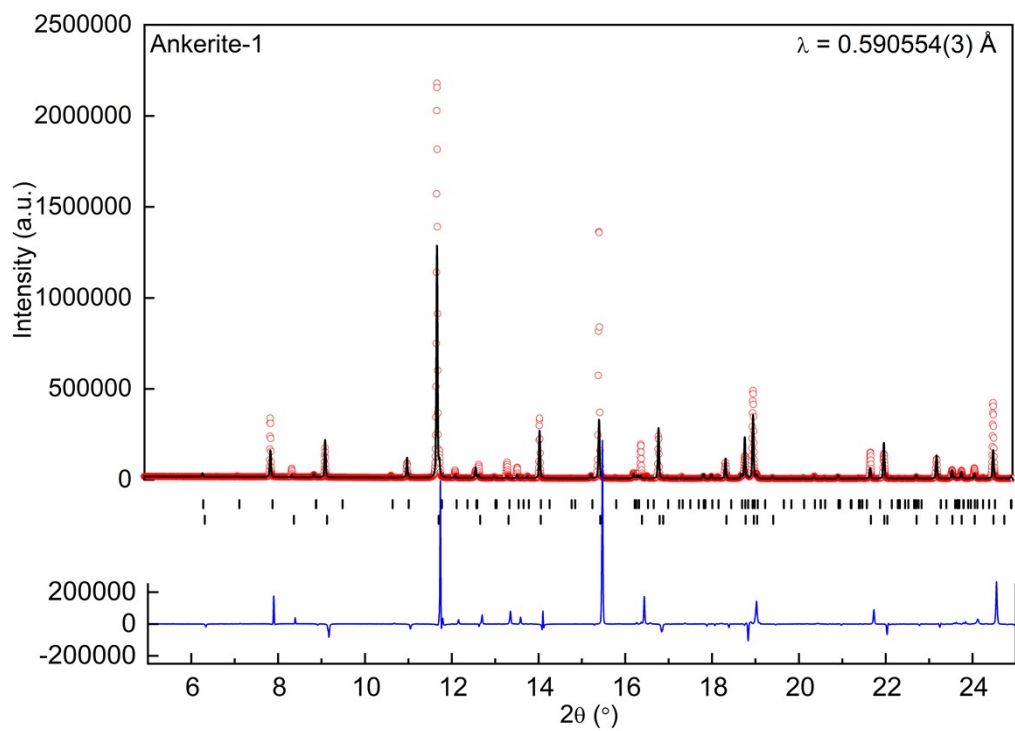

**Figure S6.** XRD pattern and fitting curve of the Rietveld refinement of natural Ankerite-1. Experimental data as red circles, calculated diffraction pattern as black line and the difference plot in blue. Tick marks show positions for: Ankerite and Gypsum, bottom to top, respectively.

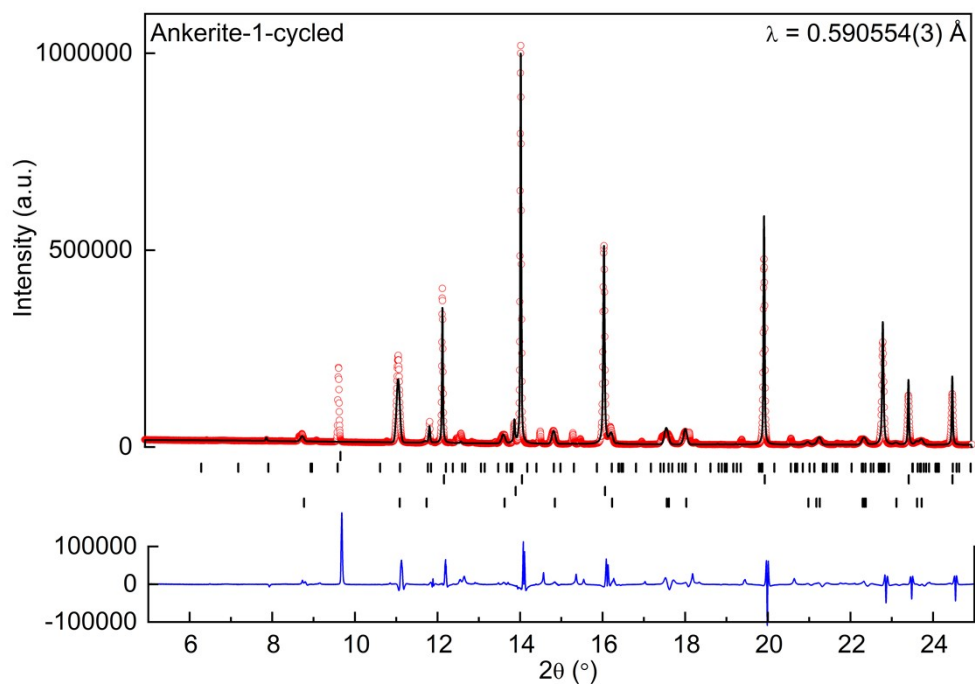

**Figure S7.** XRD pattern and fitting curve of the Rietveld refinement of cycled Ankerite-1. Experimental data as red circles, calculated diffraction pattern as black line and the difference plot in blue. Tick marks show positions for:  $\text{CaCO}_3$ ,  $\text{CaMgO}$ ,  $\text{CaO}$ , Gypsum and an unknown peak, bottom to top, respectively.

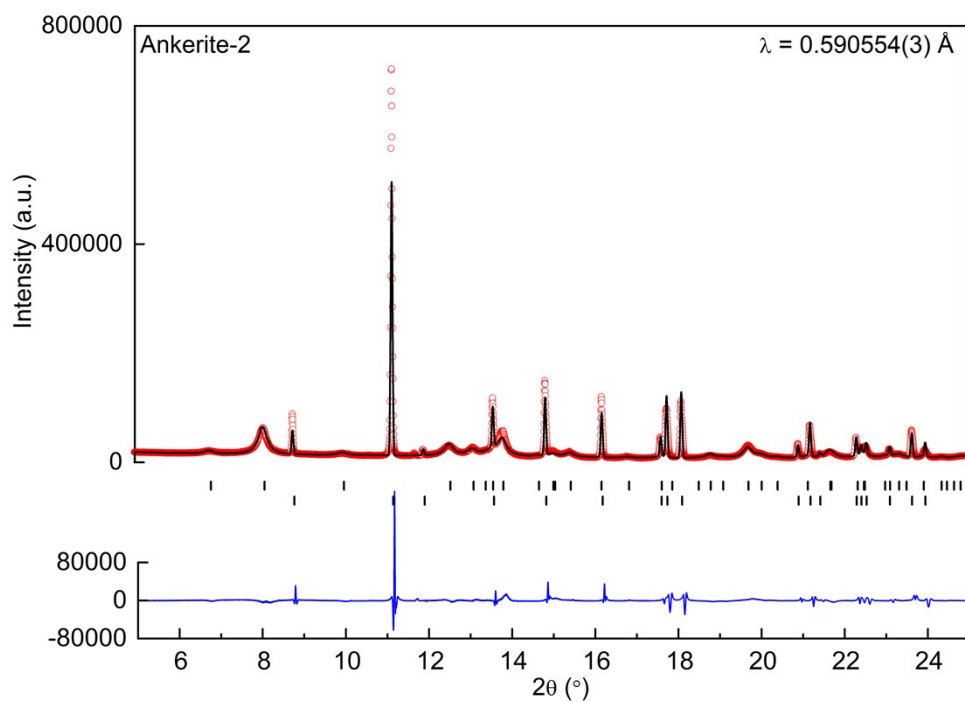

**Figure S8.** XRD pattern and fitting curve of the Rietveld refinement of natural Ankerite-2. Experimental data as red circles, calculated diffraction pattern as black line and the difference plot in blue. Tick marks show positions for: CaCO<sub>3</sub> and FeO(OH), bottom to top, respectively.

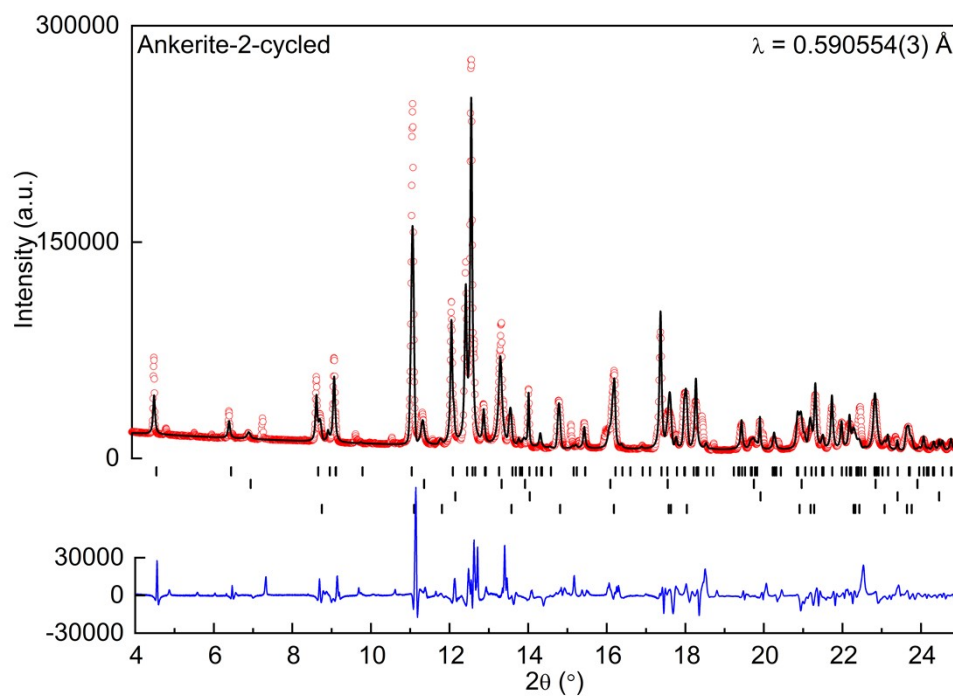

**Figure S9.** XRD pattern and fitting curve of the Rietveld refinement of cycled Ankerite-2. Experimental data as red circles, calculated diffraction pattern as black line and the difference plot in blue. Tick marks show positions for:  $\text{CaCO}_3$ ,  $\text{CaO}$ ,  $\text{Fe}_3\text{O}_4$  and  $\text{Ca}_2\text{Fe}_2\text{O}_5$  bottom to top, respectively.

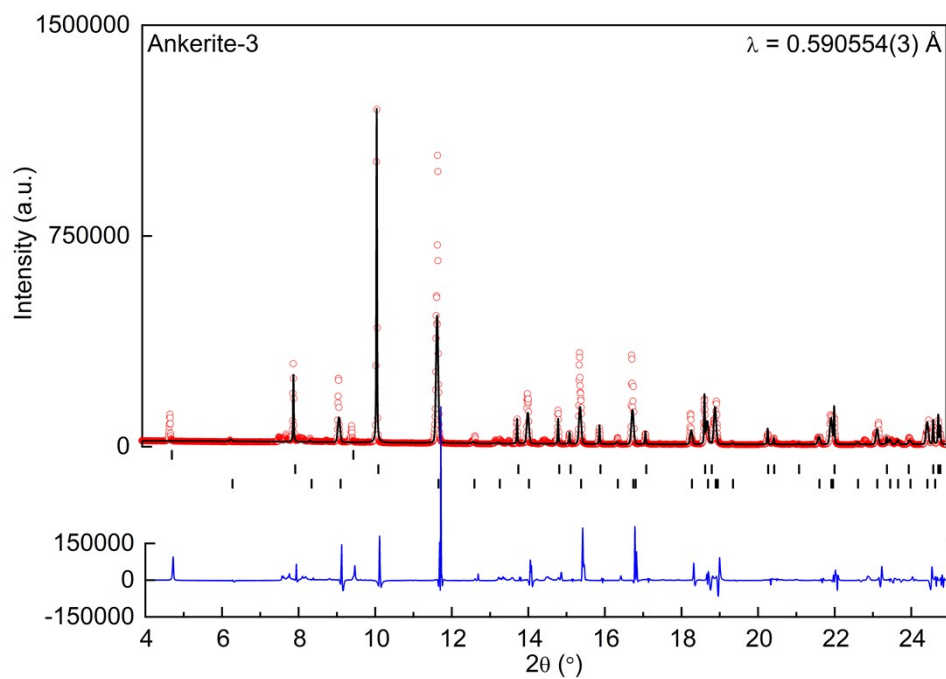

**Figure S10.** XRD pattern and fitting curve of the Rietveld refinement of natural Ankerite-3. Experimental data as red circles, calculated diffraction pattern as black line and the difference plot in blue. Tick marks show positions for: Ankerite, Quartz, and an unknown phase bottom to top, respectively.

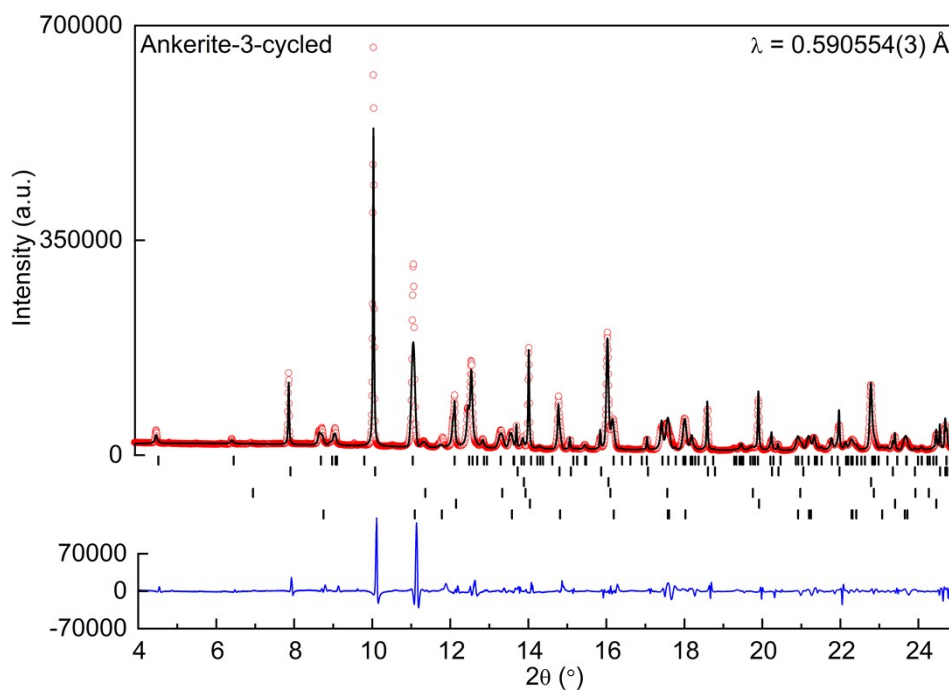

**Figure S11.** XRD pattern and fitting curve of the Rietveld refinement of cycled Ankerite-3. Experimental data as red circles, calculated diffraction pattern as black line and the difference plot in blue. Tick marks show positions for:  $\text{CaCO}_3$ ,  $\text{CaO}$ ,  $\text{MgFe}_2\text{O}_4$ , Quartz, and  $\text{Ca}_2\text{Fe}_2\text{O}_5$  bottom to top, respectively.

**Table S5.** Quantitative composition analysis of the synthesised samples after the initial carbonation (heating up from room temperature to 750 °C at 5 bar  $\text{CO}_2$ ).

| Composition (%)        | $\text{CaCO}_3$ | $\text{MgFe}_2\text{O}_4$ | $\text{MgO}$ | $\text{Ca}_2\text{Fe}_2\text{O}_5$ | $\text{Fe}_2\text{O}_3$ |
|------------------------|-----------------|---------------------------|--------------|------------------------------------|-------------------------|
| <b>CC-N-1:1:1</b>      | 48.0(2)         | 31.8(2)                   | 15.7(2)      | -                                  | 4.6(6)                  |
| <b>BM-AC-1:1:1</b>     | 39.1(1)         | 36.8(1)                   | 15.4(1)      | 8.7(5)                             | -                       |
| <b>CC-AC-1:1:1</b>     | 46.8(1)         | 36.8(1)                   | 16.4(2)      | -                                  | -                       |
| <b>CC-AC-1:0.5:0.5</b> | 61.4(1)         | 26.3(1)                   | 12.3(1)      | -                                  | -                       |
| <b>CC-AC-1:0.3:0.3</b> | 68.2(5)         | 17.4(4)                   | 10.0(3)      | 4.4(3)                             | -                       |
| <b>CC-N-1:1</b>        | 43.5(2)         | -                         | -            | -                                  | 56.6(2)                 |

**Table S6.** Quantitative composition analysis of the synthesised samples in the carbonated state after 100 cycles at 750 °C (1 h vacuum desorption / 1 h absorption at 5 bar CO<sub>2</sub>).

| <b>Composition (%)</b> | <b>CaCO<sub>3</sub></b> | <b>MgFe<sub>2</sub>O<sub>4</sub></b> | <b>MgO</b> | <b>Ca<sub>2</sub>Fe<sub>2</sub>O<sub>5</sub></b> | <b>Fe<sub>2</sub>O<sub>3</sub></b> | <b>CaO</b> | <b>CaFe<sub>3</sub>O<sub>5</sub></b> | <b>CaFe<sub>2</sub>O<sub>4</sub></b> |
|------------------------|-------------------------|--------------------------------------|------------|--------------------------------------------------|------------------------------------|------------|--------------------------------------|--------------------------------------|
| <b>CC-N-1:1:1</b>      | 39.9(1)                 | 34.9(1)                              | 14.0(1)    | 11.1(7)                                          | -                                  | -          | -                                    | -                                    |
| <b>BM-AC-1:1:1</b>     | 45.9(1)                 | 31.9(9)                              | 17.0(1)    | 5.2(6)                                           | -                                  | -          | -                                    | -                                    |
| <b>CC-AC-1:1:1</b>     | 40.5(3)                 | 36.4(3)                              | 17.3(2)    | 5.9(2)                                           | -                                  | -          | -                                    | -                                    |
| <b>CC-AC-1:0.5:0.5</b> | 35.6(9)                 | -                                    | 16.3(8)    | 43.1(9)                                          | -                                  | 2.3(2)     | 2.7(7)                               | -                                    |
| <b>CC-AC-1:0.3:0.3</b> | 27.9(3)                 | -                                    | 15.4(3)    | 40.0(3)                                          | -                                  | 16.7(2)    | -                                    | -                                    |
| <b>CC-N-1:1</b>        | 13.8(3)                 | -                                    | -          | -                                                | 11.4(5)                            | -          | -                                    | 74.7(5)                              |



XRD patterns of the synthesised Ca-Mg-Fe samples in the carbonated state before cycling (Figures S12-14-16-18-20-22) and in the carbonated state after 100 cycles at 750 °C with 1 hour vacuum desorption and 1 hour absorption at 5 bar CO<sub>2</sub> (Figures S13-15-17-19-21-23):

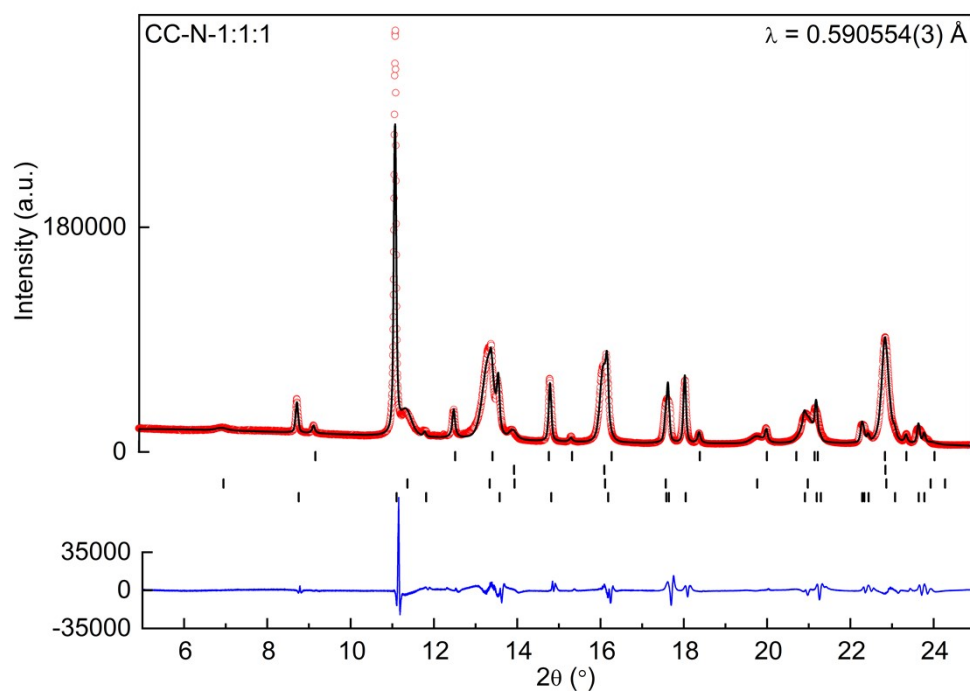

**Figure S12.** XRD pattern and fitting curve of the Rietveld refinement of CC-N-1:1:1. Experimental data as red circles, calculated diffraction pattern as black line and the difference plot in blue. Tick marks show positions for:  $\text{CaCO}_3$ ,  $\text{MgFe}_2\text{O}_4$ ,  $\text{MgO}$  and  $\text{Fe}_2\text{O}_3$  bottom to top, respectively.

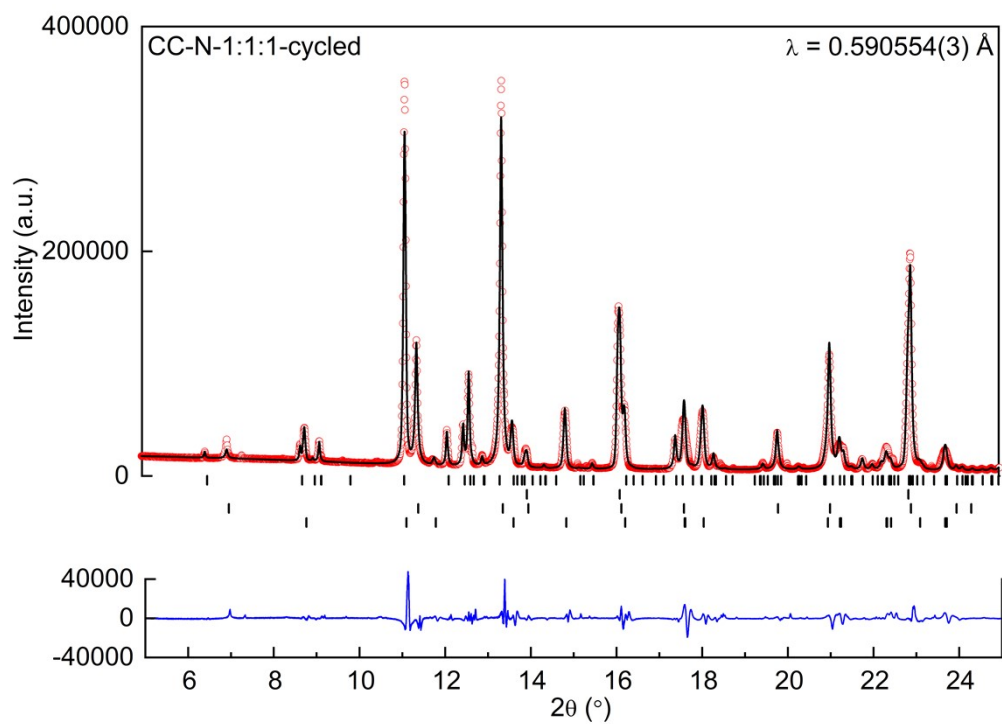

**Figure S13.** XRD pattern and fitting curve of the Rietveld refinement of cycled CC-N-1:1:1. Experimental data as red circles, calculated diffraction pattern as black line and the difference plot in blue. Tick marks show positions for:  $\text{CaCO}_3$ ,  $\text{MgFe}_2\text{O}_4$ ,  $\text{MgO}$  and  $\text{Ca}_2\text{Fe}_2\text{O}_5$  bottom to top, respectively.

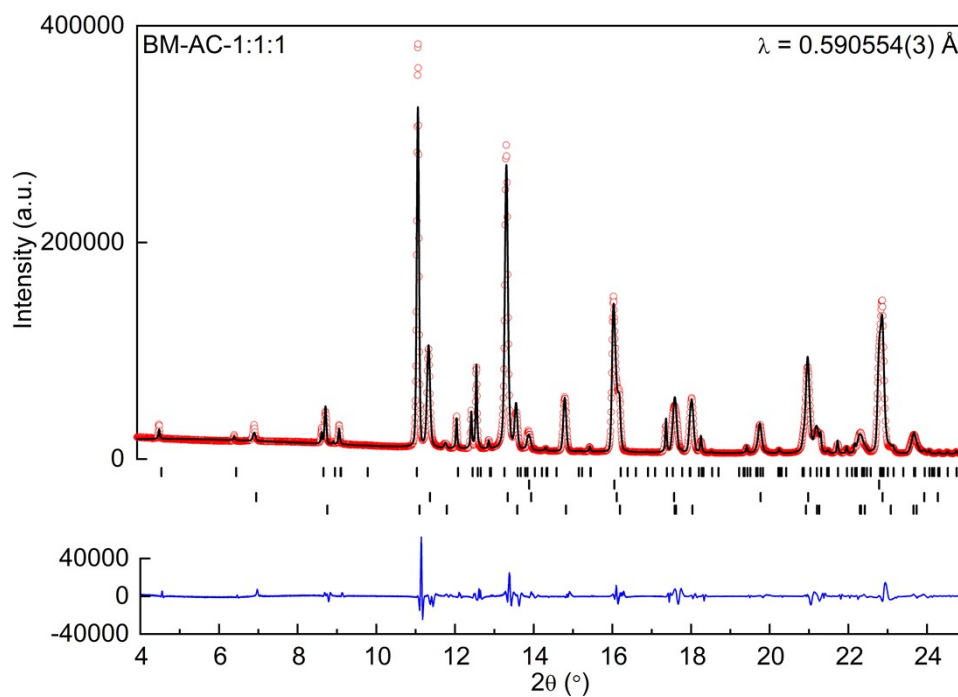

**Figure S14.** XRD pattern and fitting curve of the Rietveld refinement of BM-AC-1:1:1. Experimental data as red circles, calculated diffraction pattern as black line and the difference plot in blue. Tick marks show positions for:  $\text{CaCO}_3$ ,  $\text{MgFe}_2\text{O}_4$ ,  $\text{MgO}$  and  $\text{Ca}_2\text{Fe}_2\text{O}_5$  bottom to top, respectively.

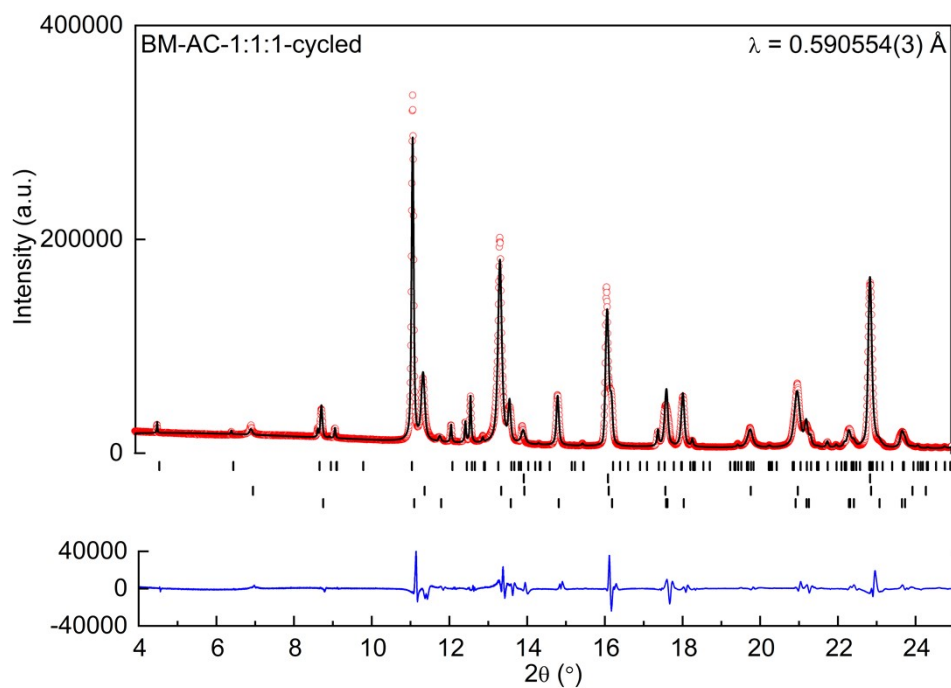

**Figure S15.** XRD pattern and fitting curve of the Rietveld refinement of cycled BM-AC-1:1:1. Experimental data as red circles, calculated diffraction pattern as black line and the difference plot in blue. Tick marks show positions for:  $\text{CaCO}_3$ ,  $\text{MgFe}_2\text{O}_4$ ,  $\text{MgO}$  and  $\text{Ca}_2\text{Fe}_2\text{O}_5$  bottom to top, respectively.

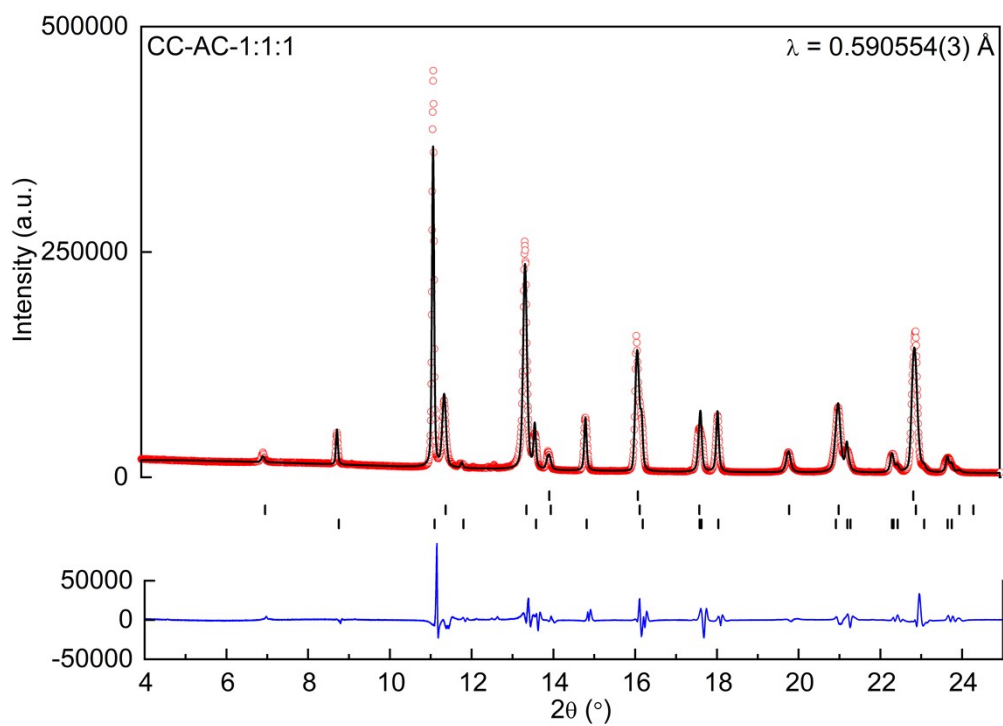

**Figure S16.** XRD pattern and fitting curve of the Rietveld refinement of CC-AC-1:1:1. Experimental data as red circles, calculated diffraction pattern as black line and the difference plot in blue. Tick marks show positions for:  $\text{CaCO}_3$ ,  $\text{MgFe}_2\text{O}_4$  and  $\text{MgO}$  bottom to top, respectively.

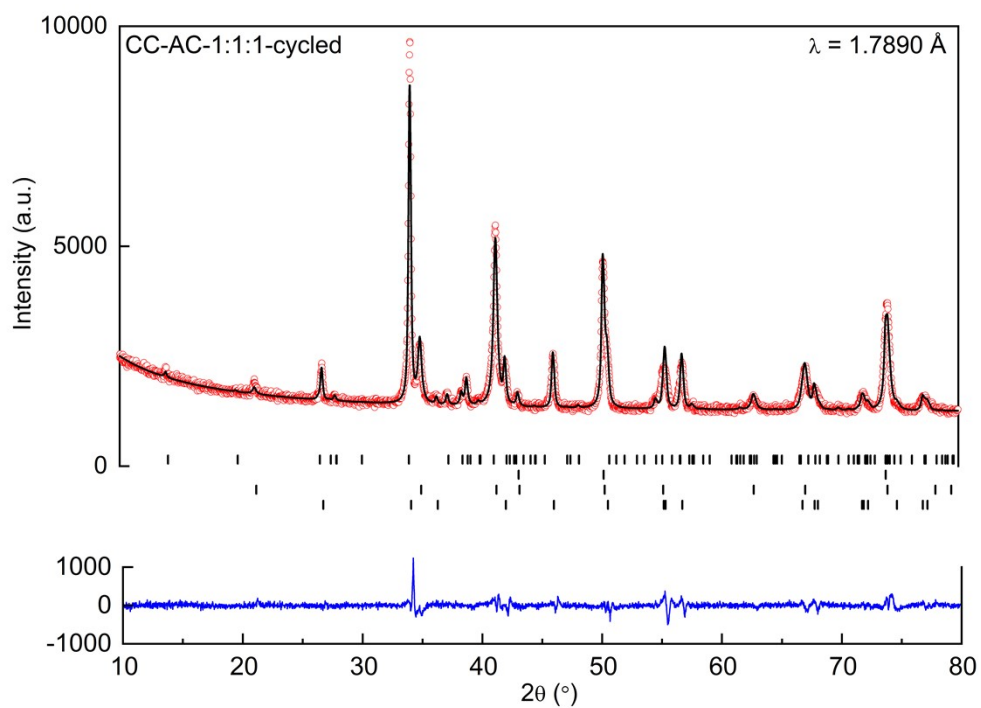

**Figure S17.** XRD pattern and fitting curve of the Rietveld refinement of cycled CC-AC-1:1:1. Experimental data as red circles, calculated diffraction pattern as black line and the difference plot in blue. Tick marks show positions for:  $\text{CaCO}_3$ ,  $\text{MgFe}_2\text{O}_4$ ,  $\text{MgO}$  and  $\text{Ca}_2\text{Fe}_2\text{O}_5$  bottom to top, respectively.

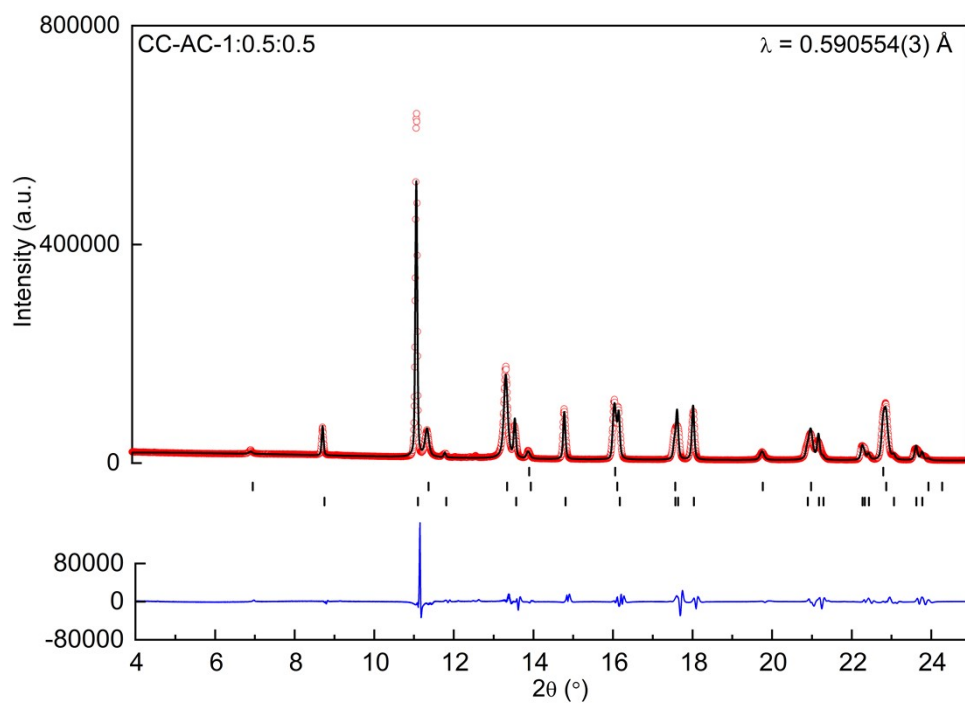

**Figure S18.** XRD pattern and fitting curve of the Rietveld refinement of CC-AC-1:0.5:0.5. Experimental data as red circles, calculated diffraction pattern as black line and the difference plot in blue. Tick marks show positions for:  $\text{CaCO}_3$ ,  $\text{MgFe}_2\text{O}_4$  and  $\text{MgO}$  bottom to top, respectively.

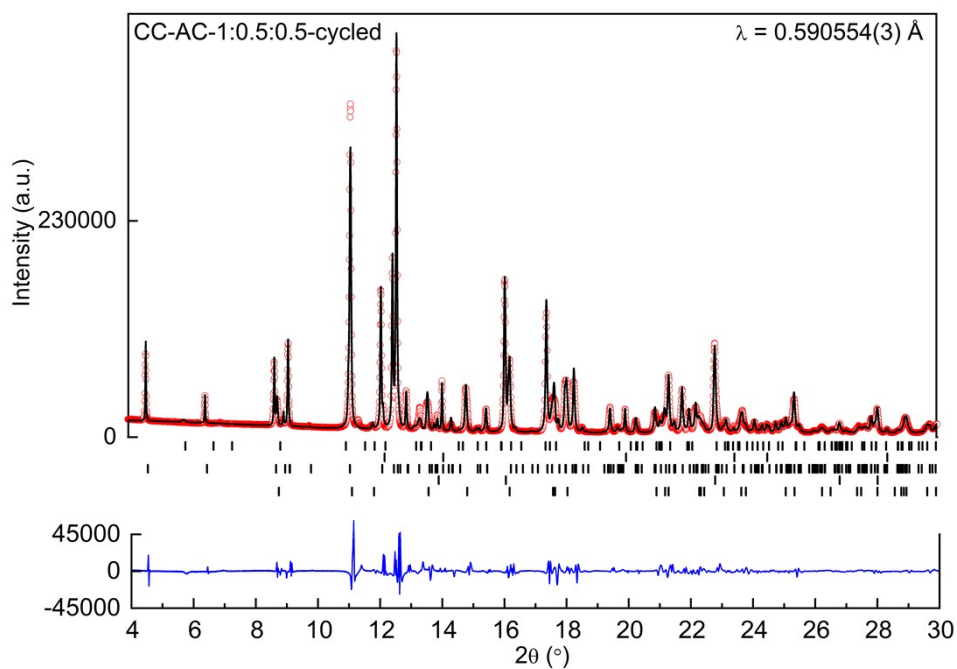

**Figure S19.** XRD pattern and fitting curve of the Rietveld refinement of cycled CC-AC-1:0.5:0.5. Experimental data as red circles, calculated diffraction pattern as black line and the difference plot in blue. Tick marks show positions for:  $\text{CaCO}_3$ ,  $\text{MgO}$ ,  $\text{Ca}_2\text{Fe}_2\text{O}_5$ ,  $\text{CaO}$  and  $\text{CaFe}_3\text{O}_5$  bottom to top, respectively.



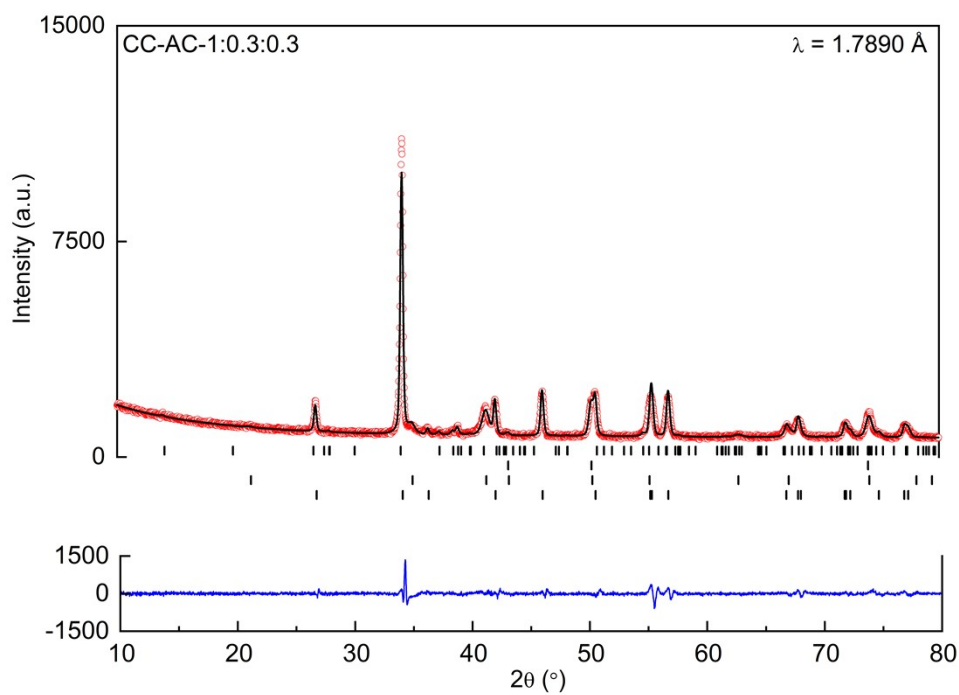

**Figure S20.** XRD pattern and fitting curve of the Rietveld refinement of CC-AC-1:0.3:0.3. Experimental data as red circles, calculated diffraction pattern as black line and the difference plot in blue. Tick marks show positions for:  $\text{CaCO}_3$ ,  $\text{MgFe}_2\text{O}_4$ ,  $\text{MgO}$  and  $\text{Ca}_2\text{Fe}_2\text{O}_5$  bottom to top, respectively.

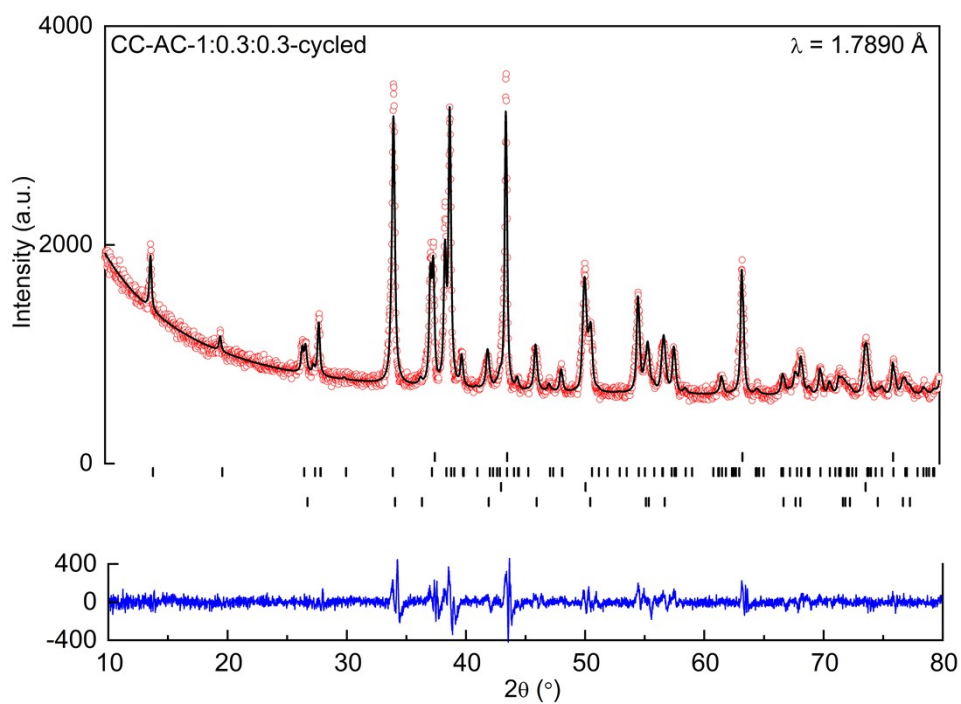

**Figure S21.** XRD pattern and fitting curve of the Rietveld refinement of cycled CC-AC-1:0.3:0.3. Experimental data as red circles, calculated diffraction pattern as black line and the difference plot in blue. Tick marks show positions for:  $\text{CaCO}_3$ ,  $\text{MgO}$ ,  $\text{Ca}_2\text{Fe}_2\text{O}_5$ , and  $\text{CaO}$  bottom to top, respectively.

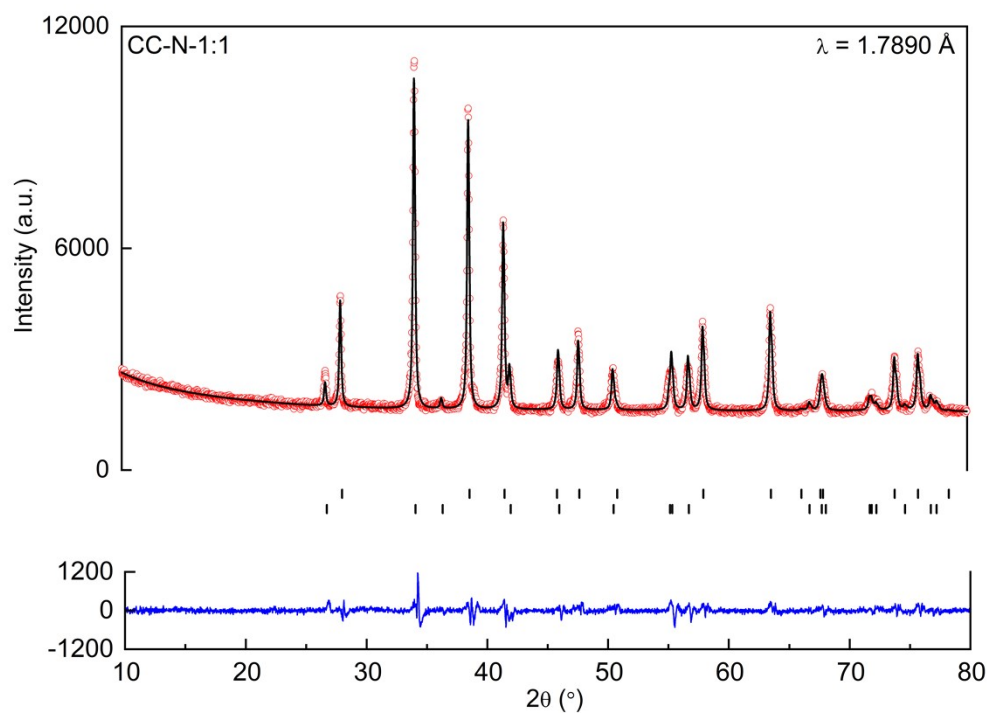

**Figure S22.** XRD pattern and fitting curve of the Rietveld refinement of CC-N-1:1. Experimental data as red circles, calculated diffraction pattern as black line and the difference plot in blue. Tick marks show positions for:  $\text{CaCO}_3$  and  $\text{Fe}_2\text{O}_3$  bottom to top, respectively.

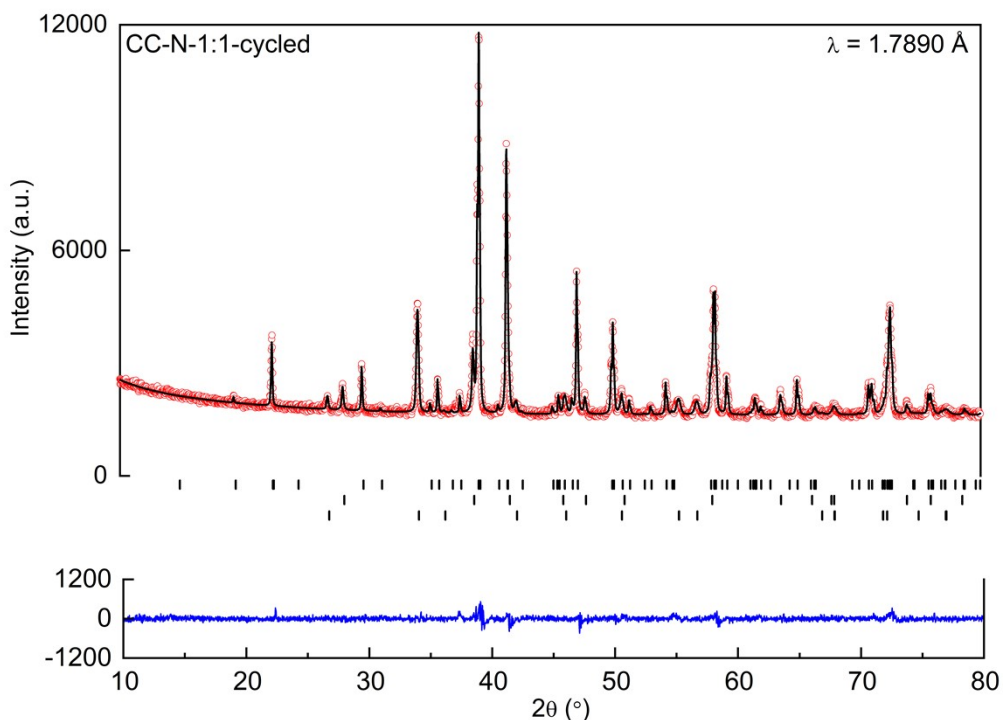

**Figure S23.** XRD pattern and fitting curve of the Rietveld refinement of cycled CC-N-1:1. Experimental data as red circles, calculated diffraction pattern as black line and the difference plot in blue. Tick marks show positions for:  $\text{CaCO}_3$ ,  $\text{Fe}_2\text{O}_3$  and  $\text{CaFe}_2\text{O}_4$  bottom to top, respectively.

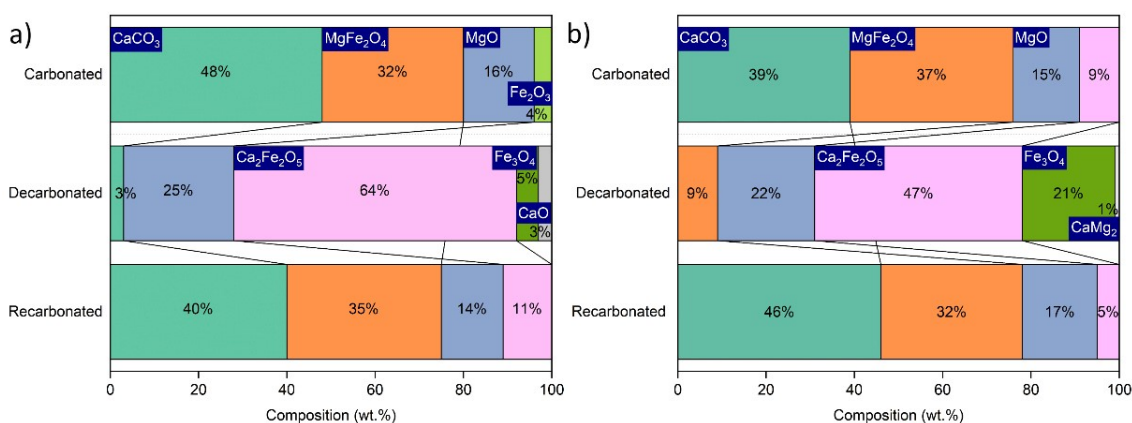

**Figure S24.** Composition of (a) CC-N-1:1 and (b) BM-AC-1:1, in the initial carbonated state, decarbonated and recarbonated at the end of the 100 cycles at 750 °C with 1 h vacuum desorption and 1 h absorption at 5 bar  $\text{CO}_2$ .

SR-XRD patterns of the synthesised samples with a Ca-Mg-Fe ratio of 1:1:1 in the decarbonated state after the 100 cycles of 1 hour vacuum desorption and 1 hour absorption at 5 bar CO<sub>2</sub> at 750 °C:

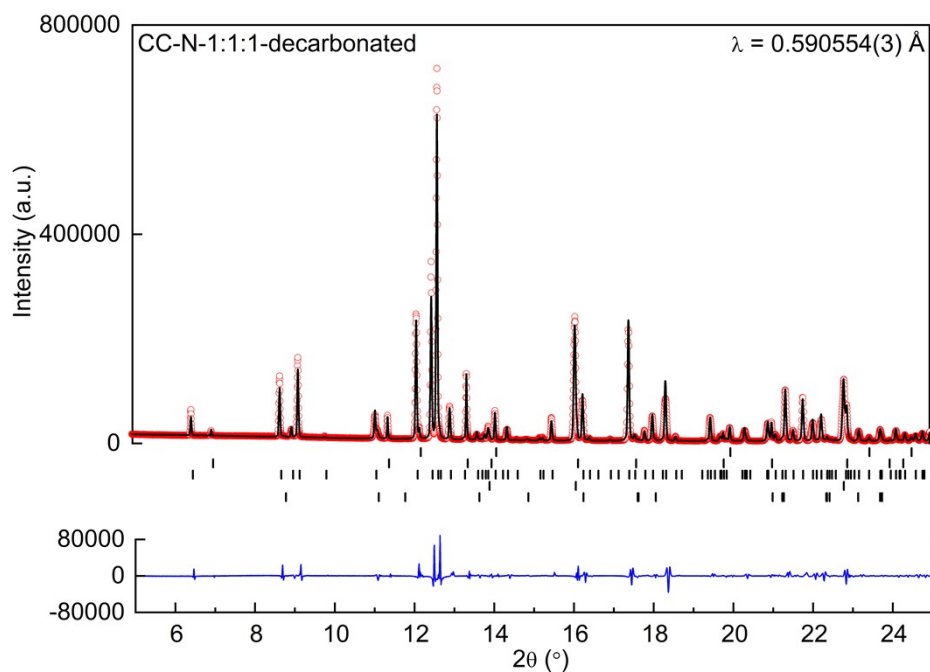

**Figure S25.** XRD pattern and fitting curve of the Rietveld refinement of decarbonated CC-N-1:1:1. Experimental data as red circles, calculated diffraction pattern as black line and the difference plot in blue. Tick marks show positions for: CaCO<sub>3</sub>, MgO, Ca<sub>2</sub>Fe<sub>2</sub>O<sub>5</sub>, Fe<sub>3</sub>O<sub>4</sub> and CaO bottom to top, respectively.

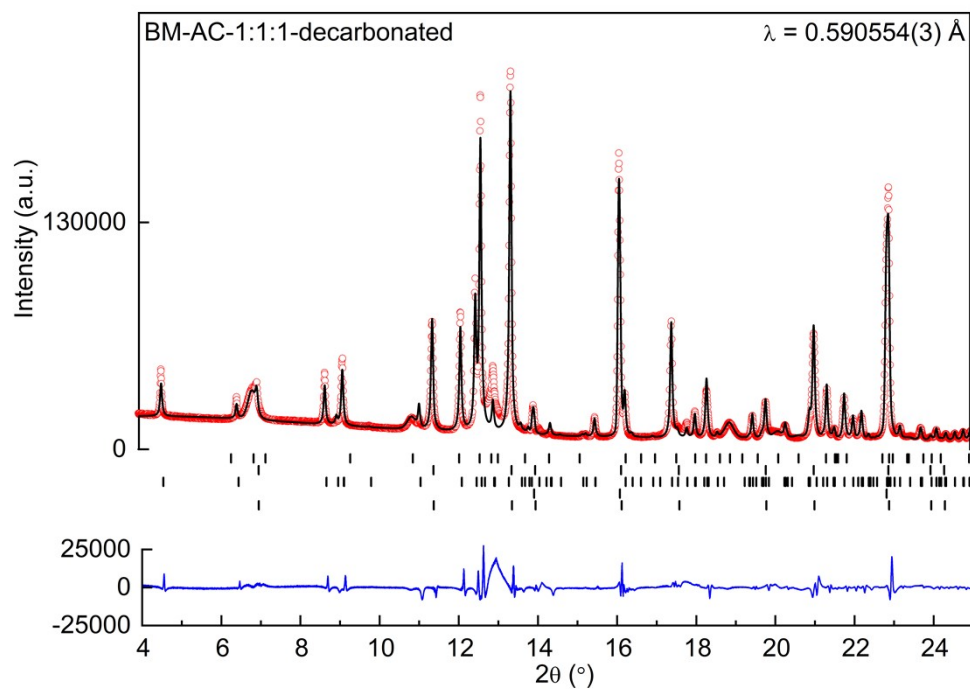

**Figure S26.** XRD pattern and fitting curve of the Rietveld refinement of decarbonated BM-AC-1:1:1. Experimental data as red circles, calculated diffraction pattern as black line and the difference plot in blue. Tick marks show positions for:  $\text{MgFe}_2\text{O}_4$ ,  $\text{MgO}$ ,  $\text{Ca}_2\text{Fe}_2\text{O}_5$ ,  $\text{Fe}_3\text{O}_4$  and  $\text{CaMg}_2$  bottom to top, respectively.

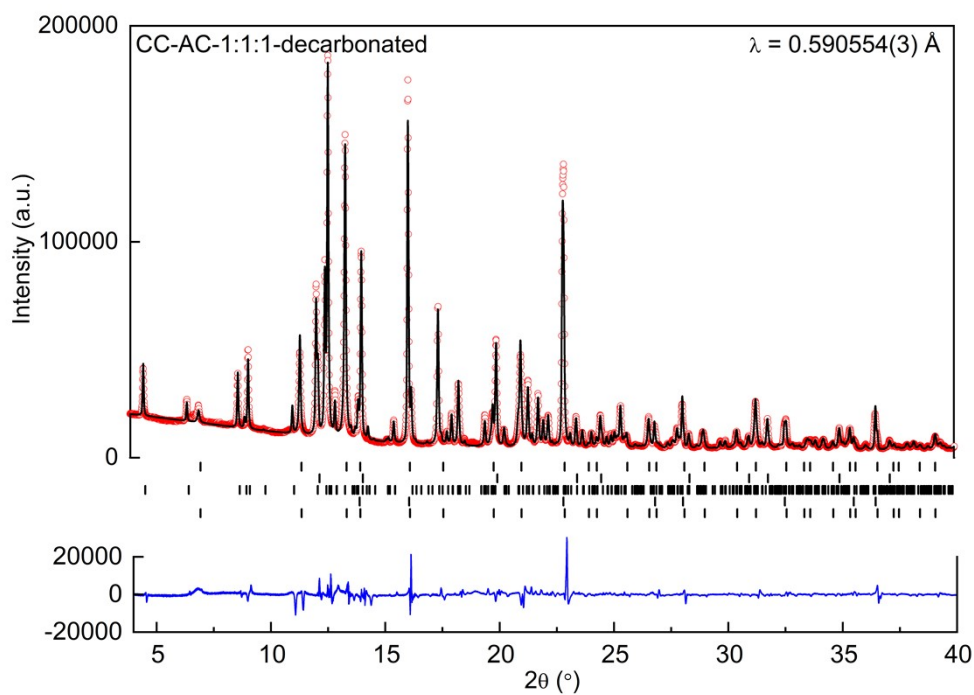

**Figure S27.** XRD pattern and fitting curve of the Rietveld refinement of decarbonated CC-AC-1:1:1. Experimental data as red circles, calculated diffraction pattern as black line and the difference plot in blue. Tick marks show positions for:  $\text{MgFe}_2\text{O}_4$ ,  $\text{MgO}$ ,  $\text{Ca}_2\text{Fe}_2\text{O}_5$ ,  $\text{CaO}$  and  $\text{Fe}_3\text{O}_4$  bottom to top, respectively.

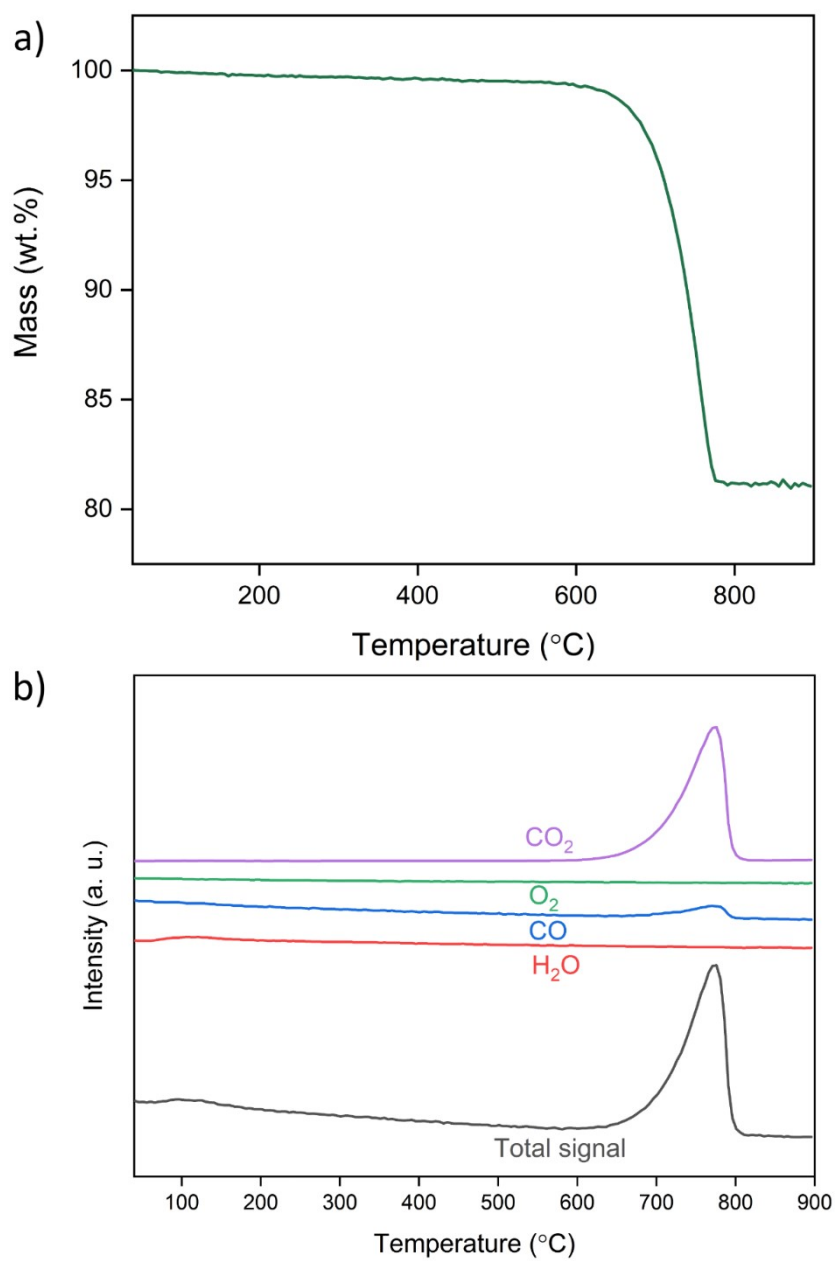

**Figure S28.** (a) TGA curve and (b) QMS data collected during the desorption while heating up to 900 °C at 20 K.min<sup>-1</sup> under an Ar flow of 20 mL.min<sup>-1</sup>.



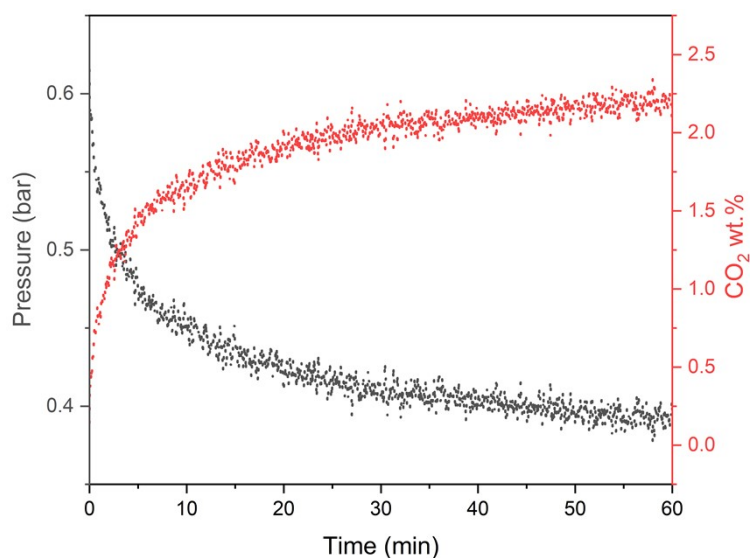

**Figure S29.** Low pressure (< 1 bar CO<sub>2</sub>) absorption at 820 °C of a Ca:Mg:Fe (1:1:1) sample in the decarbonated state, after desorption PCI at 880 °C.

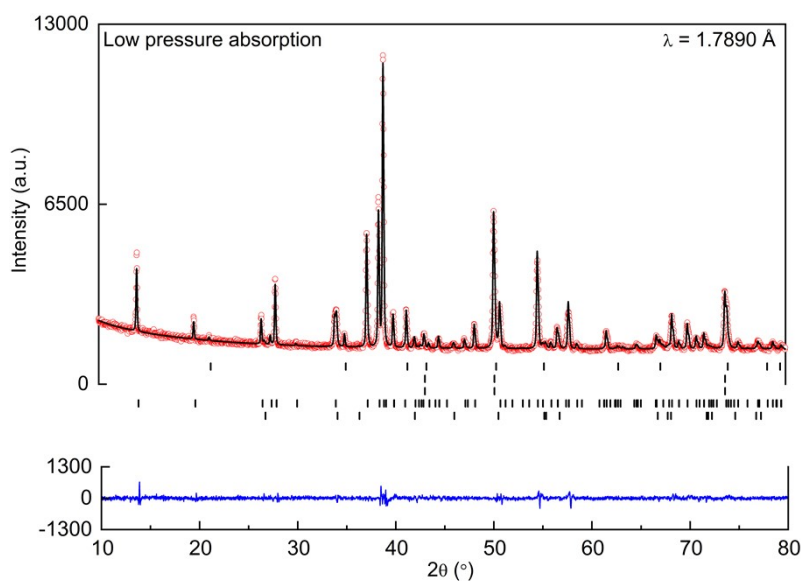

**Figure S30.** XRD pattern and fitting curve of the Rietveld refinement of CC-N-1:1 after low pressure (< 1 bar CO<sub>2</sub>) absorption 820 °C for 1 h. Experimental data as red circles, calculated diffraction pattern as black line and the difference plot in blue. Tick marks show positions for: CaCO<sub>3</sub>, Ca<sub>2</sub>Fe<sub>2</sub>O<sub>5</sub>, MgO, Fe<sub>3</sub>O<sub>4</sub> and MgFe<sub>2</sub>O<sub>4</sub> bottom to top, respectively.

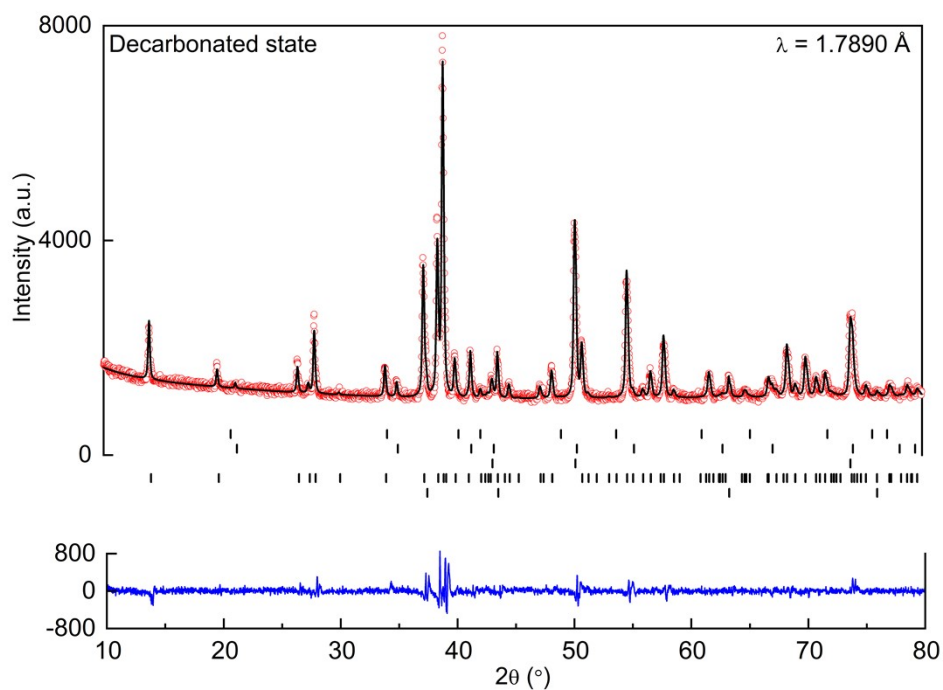

**Figure S31.** XRD pattern and fitting curve of the Rietveld refinement of CC-N-1:1 fully decarbonated at the end of the desorption PCI measurement at  $880^\circ\text{C}$ . Experimental data as red circles, calculated diffraction pattern as black line and the difference plot in blue. Tick marks show positions for:  $\text{CaCO}_3$ ,  $\text{Ca}_2\text{Fe}_2\text{O}_5$ ,  $\text{MgO}$ ,  $\text{Fe}_3\text{O}_4$  and  $\text{MgFe}_2\text{O}_4$  bottom to top, respectively.
